# Supplementary material for: The impact of Roux-en-Y gastric bypass surgery on normal metabolism in a porcine model
Source: PLoS One. 2017 Mar 3;12(3):e0173137. doi: 10.1371/journal.pone.0173137 (PMC5336237; doi:10.1371/journal.pone.0173137)
Supplement: S5 Table — (XLSX) [file pone.0173137.s005.xlsx]

## Sheet: S5 Bile acids
Plasma	Plasma pig 405	Plasma pig 416	Plasma pig 576	Plasma pig 692	Plasma pig 629	Plasma pig 675	Plasma pig 543	Plasma pig 785	Plasma pig 798	Plasma pig 821	Plasma pig 825	Plasma pig 834	Plasma pig 948	Plasma pig 672	Plasma pig 673
mmol/L	GBP	GBP	GBP	GBP	GBP	GBP	GBP	Sham	Sham	Sham	Sham	Sham	Sham	Sham	Sham
Tube #	16	17	18	19	20	21	22	23	24	25	26	27	28	29	30
GCA	39.293	16.0103	1.90141	2.00808	2.59615	6.43696	17.9542	7.35576	7.08821	6.11589	28.6136	17.0869	1.48937	5.17726	2.18261
GHDCA	319.171	177.198	266.254	196.309	3890.48	4361.3	1304.21	3718.1	11230.4	2825.92	5346.2	5837.25	2746.39	9744.37	1995.13
GDCA		2.26896	1.51502	0.886678	32.2249	31.8314	5.32135	33.6917	119.431	17.1545	37.1735	42.1504	20.2084	20.2903	5.17227
GCDCA	2937.83	195.925	207.694	153.473	233.723	290.786	470.84	527.68	1511.03	178.478	1275.2	799.935	352.603	1131.06	103.145
TCA	4.96146	2.07945	0.727775	0.651658	0.634776	0.873748	2.83852	1.58558	0.919997	0.894227	1.08455	1.03842	0.634233	0.680332	0.614445
THDCA	40.9202	13.8562	15.2515	10.4646	133.25	351.021	182.595	202.157	305.493	155.239	225.999	263.432	64.3119	471.615	43.1556
TCDCA	806.697	27.6878	10.2911	6.58572	11.8032	33.0783	91.6111	53.6654	56.2118	10.8508	54.3286	40.7736	12.6359	108.649	5.62594
TDCA					1.07275	2.98464	2.20577	1.98388	2.33264	0.733324	1.25312	1.47533	0.281932	1.22575	1.15231
TLCA	2.47136	2.41074	0.361247	0.312764	1.92402	9.93059	1.37271	6.07708	8.20658	2.81507	2.20058	1.4927	1.4728	19.9673	2.01348
CA	3.36146	6.66969	4.11802		4.98053		27.094	2.5631	4.66976	11.2513	49.96	34.1866	4.81658		0.0719694
UDCA	0.239186	13.2288		532.674		141.295	15.5968	340.28	826.429	315.203	577.237	287.08	428.396	564.212	145.43
HDCA	1.08111	85.6136	1061.79	713.905	4108.73	833.68	460.761	1102.57	4926.43	3319.99	7645.48	7177.63	5587.42	2729.43	1847.85
Muro-CA			11.2491	7.34105	110.956	34.7145	3.18391	36.9783	123.095	132.235	366.718	186.019	125.222	119.865	36.9152
CDCA	297.501	177.089	1359.39	859.945	242.156	15.5576	205.235	64.2414	584.103	286.767	3937.53	2357.8	1009.37	41.6498	122.942
DCA	0.0446816	0.752469	3.73902	2.32482	23.4149	3.8687	1.5238	5.38712	32.0562	17.6809	58.9915	63.6267	32.1972	2.42357	3.9508
LCA		26.7043	10.5616	7.09807	48.3908	43.3289	7.65604	94.2739	166.226	60.657	118.063	68.3638	102.291	184.051	63.8294
GLCA	3.5579	6.07164	1.45713	1.08677	10.2961	28.3117	1.87389	17.1152	76.8671	11.7538	31.6237	27.402	24.4899	64.6593	19.0941
ToMCA						4.69137	4.24675
oMCA	0.685958	1.49204	16.3259	10.8706	45.5454	27.6804	14.6936	18.6692	13.8882	19.2827	21.6169	10.7617	18.7189	10.3891	2.96789
aMCA						2.25641			7.17651	6.19466	6.23276	4.84336	3.23217	2.3369
7-keto-LCA	5.43957	1.13583	31.7806	22.1792	9.38021	3.6819	25.2117	14.7753	32.1864	8.11817	89.5294	39.8474	52.9958	22.782	2.56837
HCA	219.118	244.859	986.431	604.339	317.547	15.7736	1528.9	33.7963	165.044	231.706	1623.7	924.562	233.32	21.7504	15.6026
Feces	Faeces pig 405	Faeces pig 416	Faeces pig 576	Faeces pig 692	Faeces pig 629	Faeces pig 675	Faeces pig 543	Faeces pig 785	Faeces pig 798	Faeces pig 821	Faeces pig 825	Faeces pig 834	Faeces pig 948	Faeces pig 672	Faeces pig 673
pmol/mg feces	GBP	GBP	GBP	GBP	GBP	GBP	GBP	Sham	Sham	Sham	Sham	Sham	Sham	Sham	Sham
Tube #	31	32	33	34	35	36	37	38	39	40	41	42	43	44	45
GHDCA	1.33127	0.189697	0.573713	1.65746	1.55367	0.794846	0.423165	0.766224	3.34608	3.22415	99.788	9.42144	10.7361	1.58832	1.88435
GCDCA	0.990268	0.617264	0.466331	1.17927	0.481415	0.29085	0.566806	0.354446	0.678917	1.09216	38.3746	2.91641	8.84294	0.260209	0.478122
THDCA	0.0910089		0.211083	0.328387	0.0893083	0.0990159	0.0870039	0.0990734	0.46405	0.549046	1.33107	1.68042	1.96378	0.18787	0.111025
TCDCA	0.064294		0.177604	0.318756			0.0870542	0.0852208		0.145185	0.672194	0.565489	1.93305	0.055976	0.03344
TLCA					0.0468717				0.287594	0.368797	0.0700521	0.06505	0.0290547		0.186418
UDCA	1.51035	1.65236	1.47428	85.1046	25.7462	116.262	9.14144	104.048	185.917	88.398	64.4381	203.007	51.5229	73.6546	14.6833
HDCA	16.5249	11.4666	26.2878	1117.02	412.252	1089.45	139.731	968.654	2043.62	1569.68	829.503	2836.11	912.655	1002.62	172.204
Muro-CA	0.132266		3.30975	64.3949	22.2941	76.7052	9.47114	66.623	142.046	41.3104	23.5477	77.0337	54.9376	137.893	8.76137
CDCA	0.555303	1.11823	0.480044	1.5913	0.459517	0.856002	0.835124	1.0173	1.43044	1.55766	3.74595	1.75986	0.994784	1.04662	0.422351
DCA	0.546744	0.378079	2.85314	12.9729	8.64417	18.9177	3.12855	15.972	33.8186	25.3815	5.31302	11.4417	11.1483	2.57481	0.370183
LCA	51.8993	16.4644	56.7654	585.756	258.27	1724.78	237.901	1623.34	2396.2	2824.63	600.236	648.526	608.163	760.458	89.1239
GLCA	0.0930077	0.101547	0.0648697	0.10443	0.13312	0.0726434	0.0590875	0.114947	0.318153	1.33152	0.438141	0.123388	0.0795122	0.0756845	0.100065
oMCA	5.07261	3.10797	2.33646	42.1911	70.8231	27.377	9.90596	34.1096	173.966	147.762	106.645	55.6918	111.696	85.3757	14.686
aMCA			0.355409	7.84001	22.0236	5.00129	3.50721	6.38431	30.7284	31.3883	3.95573	3.00456	18.2561	20.2371	1.35563
HCA	0.422474	2.60272	1.54863	475.28	2.0508	10.4188	7.70968	11.5564	19.4072	15.1261	7.71102	8.8335	6.68289	4.19755	0.481506
Bile	Bile pig 405	Bile pig 416	Bile pig 576	Bile pig 692	Bile pig 629	Bile pig 675	Bile pig 543	Bile pig 785	Bile pig 798	Bile pig 821	Bile pig 825	Bile pig 834	Bile pig 948	Bile pig 672	Bile pig 673
µmol/L	GBP	GBP	GBP	GBP	GBP	GBP	GBP	Sham	Sham	Sham	Sham	Sham	Sham	Sham	Sham
Tube #	1	2	3	4	5	6	7	8	9	10	11	12	13	14	15
GCA	367.769	196.946	69.4744	204.485	39.1523	102.651	409.949	8.16971	9.56446	51.9394	52.3787	161.891	49.9143	13.3682	30.2542
GUDCA	126.415	36.7962	160.846	71.4961	122.886	1925.14	221.148	36.7856	156.243	98.109	118.577	184.599	223.676	35.0597	126.137
GDCA	105.778		902.547		714.979	703.025	236.577	169.213	122.871	356.372	298.424	665.487	335.088	41.4727	149.578
GCDCA	17729.4	15594.7	15037.6	36769.7	8867.41	14182.3	18392.9	3542.69	4928.87	11865.1	19977.4	22411.7	18023.3	5188.4	8645.09
TCA	105.474	39.9716	4.1529	31.9341	1.82964	12.6832	81.2222	0.79003	0.997515	3.46642	2.8133	4.28345	2.90776	1.78787	1.93517
TUDCA	59.0931	18.4739	23.5331	31.2248	6.13492	514.291	93.8131	1.45104	7.9241	10.0778	8.37211	5.21053	20.4793	8.37626	13.6989
THDCA	1915.72	804.403	3186.91	660.775	1079.63	4692.15	5318.64	474.323	812.933	2929.79	2414.74	2114.31	4525.57	1678.07	1558.48
TCDCA	6183.3	4728.09	1618.3	7654.03	248.04	2300.91	4904.03	129.577	215.384	687.613	784.643	410.986	1036.32	664.214	571.583
TDCA	16.2987	2.1173	58.5184	3.78581	14.0005	86.1764	36.552	4.00983	3.82406	15.5382	9.07959	9.52927	14.4238	4.18213	6.41837
TLCA	51.682	28.1129	151.439	20.1902	37.0751	194.398	72.6895	28.0607	27.5941	76.8524	19.4572	12.4579	85.7562	62.0842	81.645
CA											21.5702	29.8368
HDCA			2.6916		7.56538				9.99724		327.44	484.116	45.9598
CDCA											25.4635	28.0687
GLCA	89.4884	58.1981	506.469	16.1468	463.592	280.545	143.483	325.38	285.647	422.575	212.853	374.847	803.512	166.401	581.788
ToMCA	92.5211	59.3227	9.63368	57.911	5.34089	141.548	85.4247			11.3074	9.33284	5.95715	10.6786	4.5063	4.33065
oMCA						4.08901				4.12272	15.6839	22.5223	5.07388
HCA	24.9553	13.431		4.50906	3.83156		8.50427				218.572	263.983	8.84109
